# Supplementary material for: Acid-driven, microwave-assisted production of photoluminescent carbon nitride dots from N,N-dimethylformamide
Source: Royal Society of Chemistry journal article supplement (doi:10.1039/c1ra00249j), 2011-01-01
Supplement: c1ra00249j.pdf [file c1ra00249j.pdf]

## Electronic Supplementary Information

### Acid-driven, microwave-assisted production of photoluminescent carbon nitride dots from N,N-dimethylformamide

Sen Liu,<sup>a</sup> Jingqi Tian,<sup>a,b</sup> Lei Wang,<sup>a</sup> Junfeng Zhai,<sup>a</sup> Yonglan Luo,<sup>a</sup> Wenbo Lu,<sup>a</sup> and  
Xuping Sun<sup>\*a</sup>

<sup>a</sup> State Key Lab of Electroanalytical Chemistry, Changchun Institute of Applied Chemistry, Chinese Academy of Sciences, Changchun 130022, Jilin, China

<sup>b</sup> Graduate School of the Chinese Academy of Sciences, Beijing 100039, China

\*To whom correspondence should be addressed. Phone/Fax: (+86)-431-85262065.

E-mail: (X.S.) sunxp@ciac.jl.cn

#### Quantum Yield Measurements

Quantum yield was measured according to established procedure (Lakowicz, J. R. *Principles of Fluorescence Spectroscopy*, 2<sup>nd</sup> Ed., **1999**, Kluwer Academic/Plenum Publishers, New York). The optical densities were measured on UV-vis spectra were obtained on a UV5800 Spectrophotometer. Quinine sulfate in 0.1 M H<sub>2</sub>SO<sub>4</sub> (literature quantum yield 0.54 at 360 nm) was chose as a standard. Absolute values are calculated using the standard reference sample that has a fixed and known fluorescence quantum yield value, according to the following equation:

$$\varphi_x = \varphi_{std} \frac{I_x}{A_x} \frac{A_{std}}{I_{std}} \frac{\eta_x^2}{\eta_{std}^2}$$

Where  $\varphi$  is the quantum yield,  $I$  is the measured integrated emission intensity, and  $A$  is the optical density, and  $\eta$  is the refractive index. The subscript “std” refers to the reference fluorophore of known quantum yield. In order to minimize re-absorption effects absorbencies in the 10 mm fluorescence cuvette were kept under 0.1 at the excitation wavelength (360 nm).

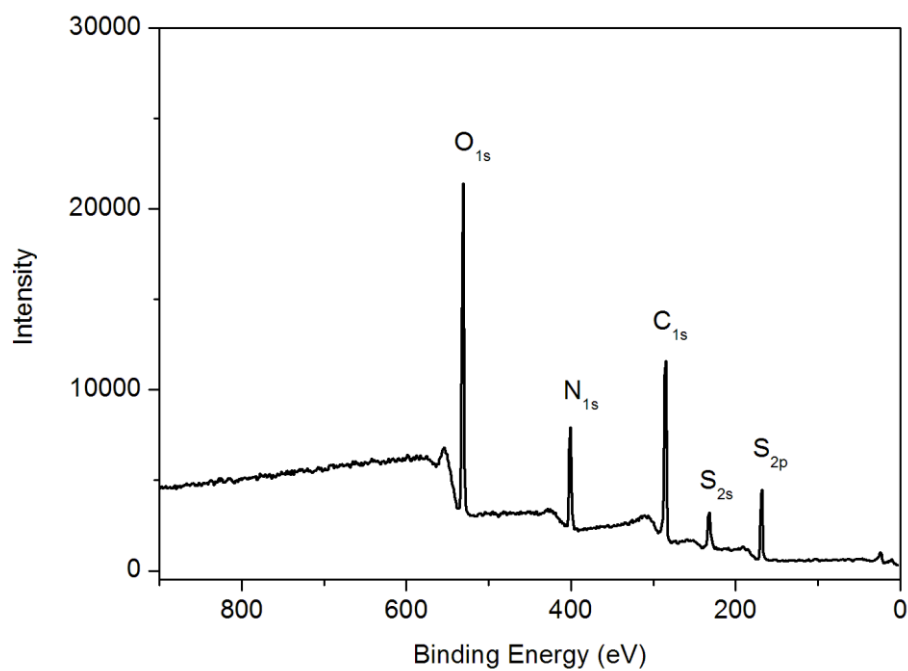

**Fig. S1** XPS spectrum of CNDs thus obtained.

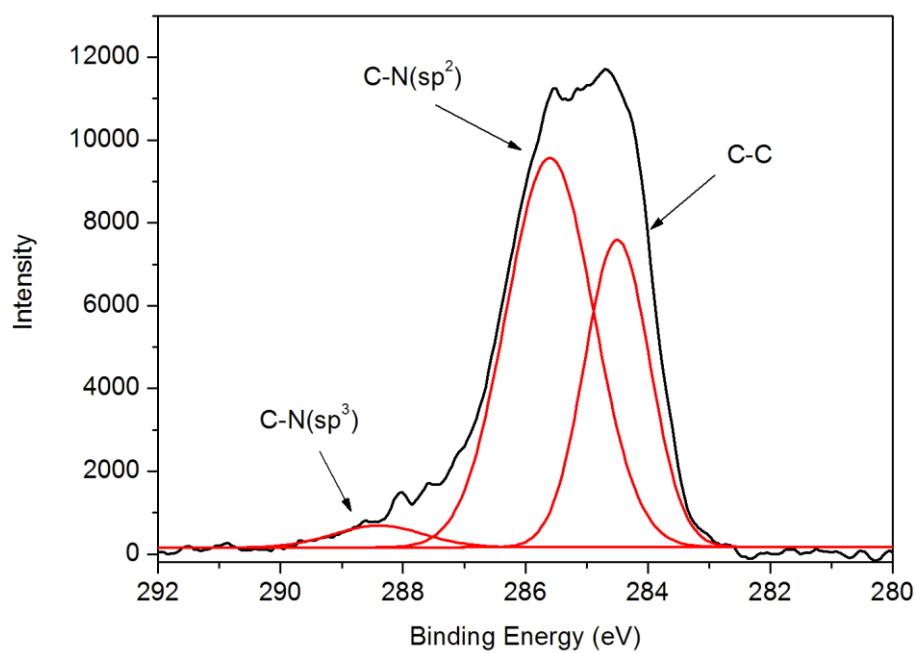

**Fig. S2**  $C_{1s}$  spectrum of CNDs thus obtained.

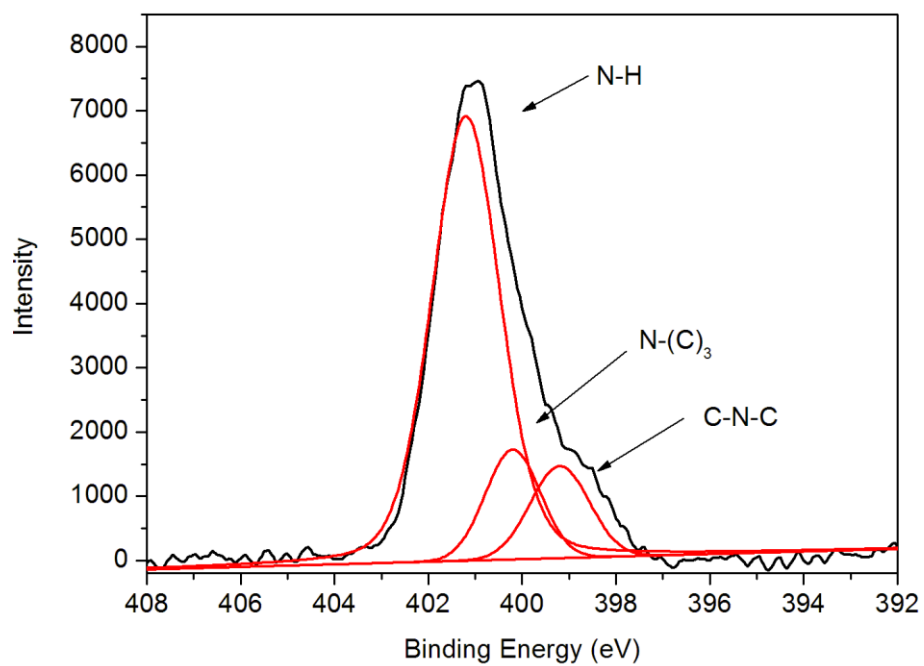

**Fig. S3**  $N_{1s}$  spectrum of CNDs thus obtained.

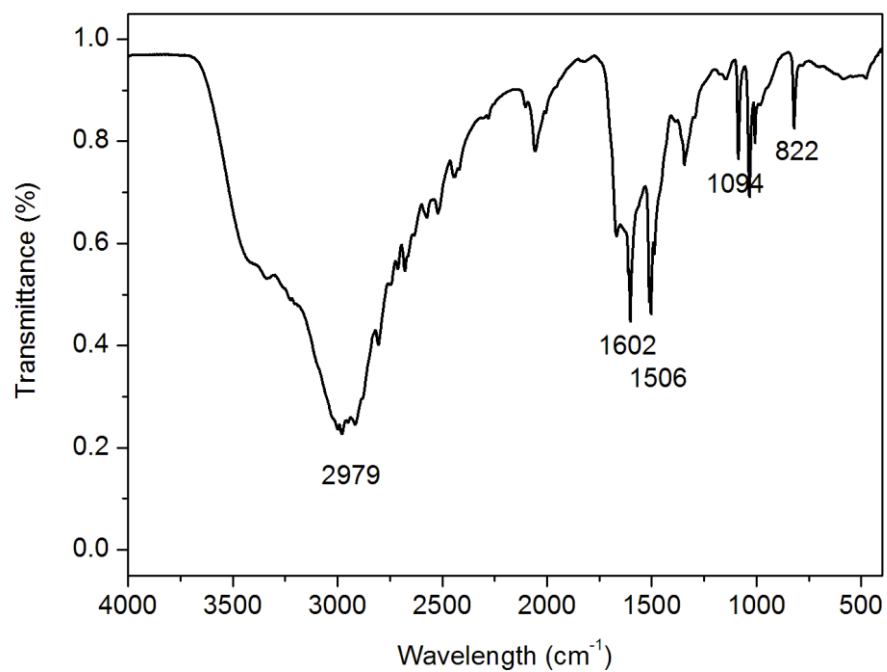

**Fig. S4** FT-IR spectrum of CNDs thus obtained.

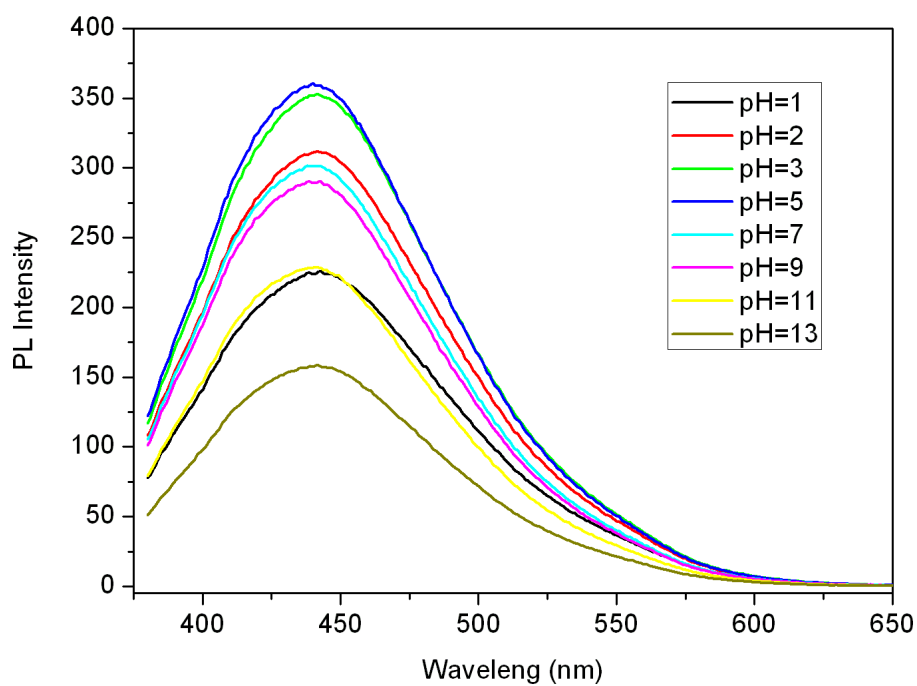

**Fig. S5** The effect of the solution pH value on CNDs fluorescence.

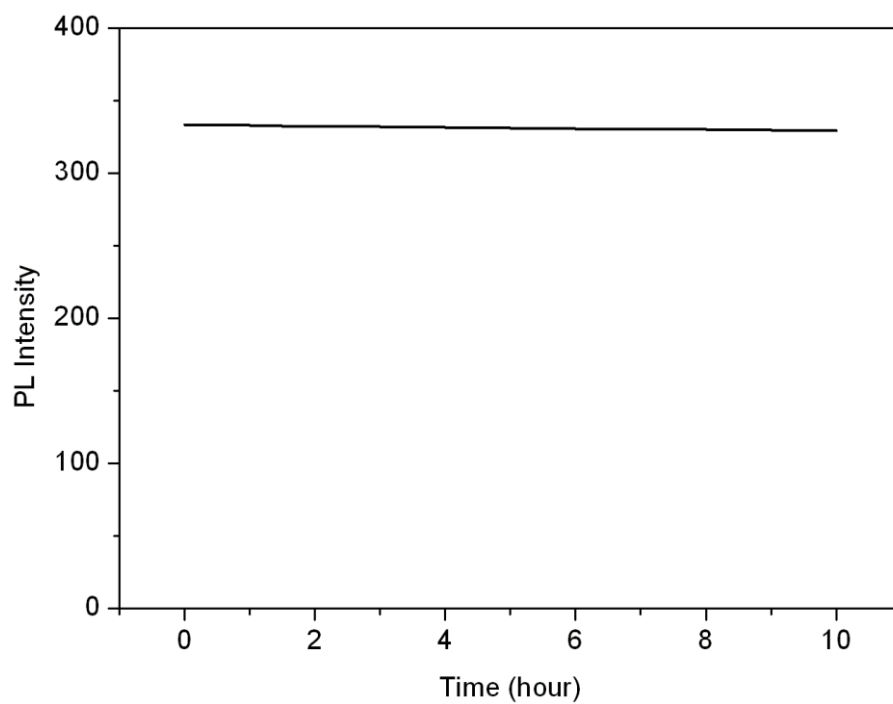

**Fig. S6** Emission intensity of CNDs during continuous excitation at 365 nm.



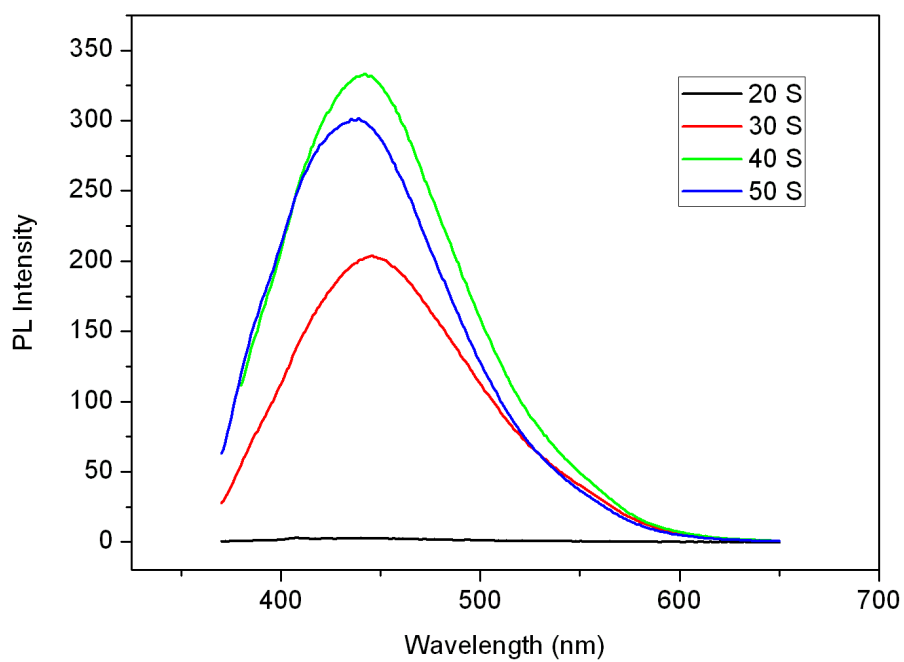

**Fig. S7** The effect of microwave irradiation time on the intensity of CNDs.
